# Supplementary material for: Effect of aortic valve phenotype and sex on aorta dilation in patients with aortic stenosis
Source: PubMed Central journal article supplement — Open Heart. 2024 Oct 17;11(2):e002912. doi: 10.1136/openhrt-2024-002912 (PMC11487820; doi:10.1136/openhrt-2024-002912), 2024-10-17

**Online Table 1: Treatment Types Used for Hypertension and Hyperlipidemia According to Valve Phenotype**

|                                                 | <b>Whole Cohort<br/>(n=310)</b> | <b>TAV<br/>(n=224, 72%)</b> | <b>BAV<br/>(n=86, 28%)</b> | <b>p Value</b>   |
|-------------------------------------------------|---------------------------------|-----------------------------|----------------------------|------------------|
| <b>HYPERTENSION TREATMENT</b>                   |                                 |                             |                            |                  |
| Angiotensin II receptor blockers, n (%)         | 93 (30)                         | 76 (34)                     | 17 (20)                    | <b>0.018</b>     |
| Angiotensin-converting enzyme inhibitors, n (%) | 86 (28)                         | 76 (34)                     | 10 (12)                    | <b>&lt;0.001</b> |
| Beta-blockers, n (%)                            | 92 (30)                         | 80 (36)                     | 12 (14)                    | <b>&lt;0.001</b> |
| Diuretics, n (%)                                | 84 (27)                         | 74 (33)                     | 10 (12)                    | <b>&lt;0.001</b> |
| Calcium channel blockers, n (%)                 | 87 (28)                         | 75 (33)                     | 12 (14)                    | <b>&lt;0.001</b> |
| <b>LIPID-LOWERING TREATMENT</b>                 |                                 |                             |                            |                  |
| Statins, n (%)                                  | 198 (64)                        | 170 (76)                    | 28 (33)                    | <b>&lt;0.001</b> |
| Fibrates, n (%)                                 | 13 (4)                          | 11 (5)                      | 3 (3)                      | 0.165            |

**Online Table 2: Univariate and Multivariate Logistic Regression Models of Fast Progression of Ascending Aorta Dilatation for the Whole Cohort**

|                                  | Univariate              |              | Multivariate     |         |
|----------------------------------|-------------------------|--------------|------------------|---------|
|                                  | OR [CI 95%]             | p Value      | OR [CI95%]       | p Value |
| <b>Bicuspid aortic valve</b>     | <b>1.80 [1.08-2.98]</b> | <b>0.023</b> | 1.04 [0.50-2.14] | 0.922   |
| Male sex                         | 0.93 [0.57-1.54]        | 0.801        |                  |         |
| <b>Age</b>                       | <b>0.98 [0.96-0.99]</b> | <b>0.006</b> | 0.98 [0.96-1.00] | 0.086   |
| Hypertension                     | 0.60 [0.35-1.02]        | 0.061        |                  |         |
| Diabetes                         | 1.25 [0.73-2.13]        | 0.416        |                  |         |
| Glycemia                         | 0.96 [0.82-1.11]        | 0.572        |                  |         |
| BMI                              | 1.01 [0.96-1.01]        | 0.710        |                  |         |
| BSA                              | 1.88 [0.63-5.64]        | 0.261        |                  |         |
| <b>LDL</b>                       | <b>1.37 [1.04-1.80]</b> | <b>0.027</b> | 1.27 [0.96-1.69] | 0.097   |
| Apo B / Apo A ratio              | 2.20 [0.63-7.66]        | 0.215        |                  |         |
| HDL                              | 0.80 [0.46-1.41]        | 0.440        |                  |         |
| TG                               | 1.05 [0.78-1.41]        | 0.771        |                  |         |
| SBP baseline, mmHg               | 0.99 [0.98-1.00]        | 0.296        |                  |         |
| DBP baseline, mmHg               | 1.01 [0.96-1.04]        | 0.456        |                  |         |
| Valvulo-arterial impedance       | 1.12 [0.82-1.53]        | 0.483        |                  |         |
| V <sub>peak</sub> baseline, cm/s | 1.00 [1.00-1.01]        | 0.449        |                  |         |
| ΔV <sub>peak</sub> , cm/s/year   | 1.00 [1.00-1.01]        | 0.428        |                  |         |
| AA diameter baseline, mm         | 0.98 [0.94-1.03]        | 0.435        |                  |         |

**Legend:** BMI; body mass index, BSA; body surface area, LDL; low density lipoprotein, Apo A/Apo B; Apolipoprotein A1/ Apolipoprotein B, HDL; high density lipoprotein, TG; triglycerides, SBP; systolic blood pressure, DBP; diastolic blood pressure, V<sub>peak</sub>; peak aortic jet velocity.

**Online Table 3: Logistic Regression Models of Fast Progression of Ascending Aorta Dilation According to Sex**

|                                  | Men                 |         | Women                   |              |
|----------------------------------|---------------------|---------|-------------------------|--------------|
|                                  | 112 Fast / 110 Slow |         | 43 Fast / 45 Slow       |              |
|                                  | OR [CI 95%]         | p Value | OR [CI95%]              | p Value      |
| Bicuspid aortic valve            | 1.33 [0.71-2.51]    | 0.373   | <b>3.47 [1.42-8.49]</b> | <b>0.006</b> |
| Age                              | 0.99 [0.97-1.01]    | 0.215   | <b>0.96 [0.93-0.99]</b> | <b>0.004</b> |
| Hypertension                     | 0.67 [0.34-1.33]    | 0.253   | 0.46 [0.19-1.12]        | 0.088        |
| Diabetes                         | 0.93 [0.52-1.68]    | 0.816   | 0.53 [0.16-1.72]        | 0.288        |
| Glycemia                         | 0.97 [0.81-1.15]    | 0.695   | 0.89 [0.63-1.28]        | 0.534        |
| BMI                              | 1.03 [0.97-1.01]    | 0.308   | 0.96 [0.87-1.05]        | 0.360        |
| BSA                              | 4.37 [0.94-20.44]   | 0.061   | 0.24 [0.01-4.17]        | 0.329        |
| LDL                              | 1.27 [0.91-1.79]    | 0.159   | <b>1.71 [1.02-2.86]</b> | <b>0.043</b> |
| Apo B / Apo A ratio              | 2.33 [0.55-9.87]    | 0.253   | 1.82 [0.15-21.98]       | 0.638        |
| HDL                              | 0.59 [0.29-1.20]    | 0.145   | 1.75 [0.57-5.43]        | 0.330        |
| TG                               | 1.06 [0.77-1.48]    | 0.708   | 0.93 [0.44-1.97]        | 0.854        |
| SBP baseline, mmHg               | 0.98 [0.98-1.01]    | 0.642   | 0.99 [0.96-1.01]        | 0.216        |
| DBP baseline, mmHg               | 1.01 [0.98-1.04]    | 0.572   | 1.01 [0.97-1.06]        | 0.615        |
| Valvulo-arterial impedance       | 1.45 [0.99-2.12]    | 0.054   | 0.56 [0.30-1.05]        | 0.071        |
| V <sub>peak</sub> baseline, cm/s | 1.00 [1.00-1.01]    | 0.313   | 1.00 [0.99-1.01]        | 0.709        |
| ΔV <sub>peak</sub> , cm/s/year   | 1.01 [0.99-1.02]    | 0.645   | 1.00 [0.97-1.02]        | 0.882        |
| AA diameter baseline, mm         | 0.95 [0.90-1.01]    | 0.058   | 1.08 [0.98-1.19]        | 0.120        |

**Legend:** BMI; body mass index, BSA; body surface area, LDL; low density lipoprotein, Apo A/Apo B; Apolipoprotein A1/ Apolipoprotein B, HDL; high density lipoprotein, TG; triglycerides, SBP; systolic blood pressure, DBP; diastolic blood pressure, V<sub>peak</sub>; peak aortic jet velocity.

**Online Table 4: Logistic Regression Models of Fast Progression of Ascending Aorta Dilation According to Valve Phenotype**

|                                  | TAV                 |         | BAV               |         |
|----------------------------------|---------------------|---------|-------------------|---------|
|                                  | 103 Fast / 121 Slow |         | 52 Fast / 34 Slow |         |
|                                  | OR [CI 95%]         | p Value | OR [CI95%]        | p Value |
| Age                              | 0.97 [0.94-1.01]    | 0.101   | 0.99 [0.96-1.02]  | 0.449   |
| Hypertension                     | 0.70 [0.31-1.59]    | 0.394   | 0.79 [0.33-1.87]  | 0.600   |
| Diabetes                         | 1.13 [0.63-2.03]    | 0.672   | 0.86 [0.18-4.11]  | 0.851   |
| Glycemia                         | 0.97 [0.84-1.16]    | 0.865   | 1.02 [0.65-1.61]  | 0.933   |
| BMI                              | 1.02 [0.96-1.08]    | 0.580   | 1.04 [0.94-1.16]  | 0.464   |
| BSA                              | 2.21 [0.58-8.41]    | 0.247   | 1.59 [0.22-11.68] | 0.646   |
| LDL                              | 1.24 [0.89-1.74]    | 0.200   | 1.40 [0.82-2.40]  | 0.221   |
| Apo B / Apo A ratio              | 2.00 [0.41-9.76]    | 0.389   | 2.15 [0.26-17.89] | 0.478   |
| HDL                              | 0.96 [0.50-1.85]    | 0.908   | 0.36 [0.11-1.21]  | 0.099   |
| TG                               | 0.94 [0.63-1.41]    | 0.766   | 1.22 [0.75-1.96]  | 0.424   |
| SBP baseline, mmHg               | 1.00 [0.98-1.01]    | 0.652   | 1.00 [0.98-1.03]  | 0.914   |
| DBP baseline, mmHg               | 1.01 [0.98-1.04]    | 0.385   | 0.98 [0.93-1.03]  | 0.432   |
| Valvulo-arterial impedance       | 1.31 [0.89-1.93]    | 0.174   | 1.21 [0.63-2.32]  | 0.570   |
| V <sub>peak</sub> baseline, cm/s | 1.00 [1.00-1.01]    | 0.379   | 1.00 [0.99-1.01]  | 0.781   |
| ΔV <sub>peak</sub> , cm/s/year   | 1.00 [1.00-1.01]    | 0.849   | 1.00 [0.97-1.02]  | 0.168   |
| AA diameter baseline, mm         | 0.96 [0.90-1.02]    | 0.221   | 0.97 [0.90-1.04]  | 0.338   |

**Legend:** BMI; body mass index, BSA; body surface area, LDL; low density lipoprotein, Apo A/Apo B; Apolipoprotein A1/ Apolipoprotein B, HDL; high density lipoprotein, TG; triglycerides, SBP; systolic blood pressure, DBP; diastolic blood pressure, V<sub>peak</sub>; peak aortic jet velocity.

**Online Figure 1: Linear Prediction Models of Aortic Root Size According to Aortic Valve Phenotype and Sex**

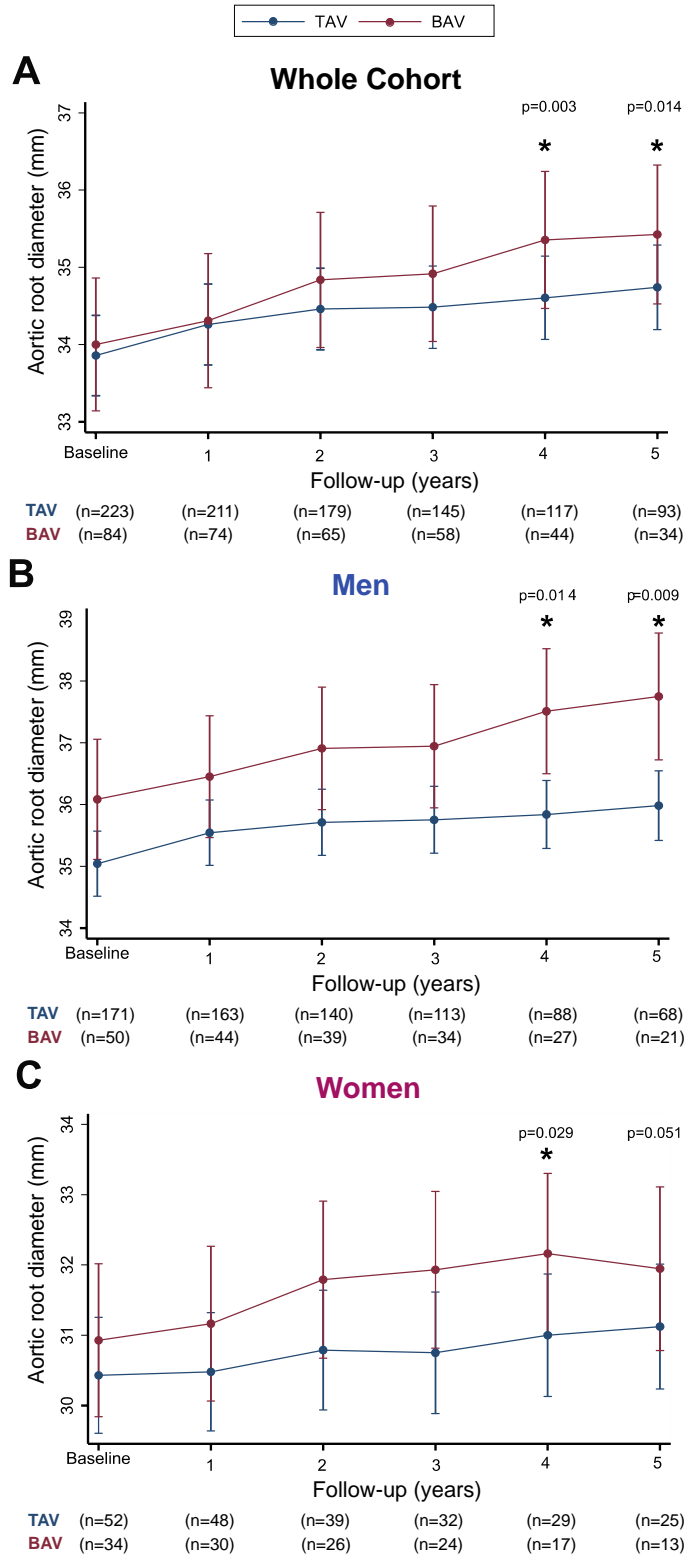

**Online Figure 2: Annualized Aortic Root Dilation Rate According to Valve Phenotype and Fusion Type**

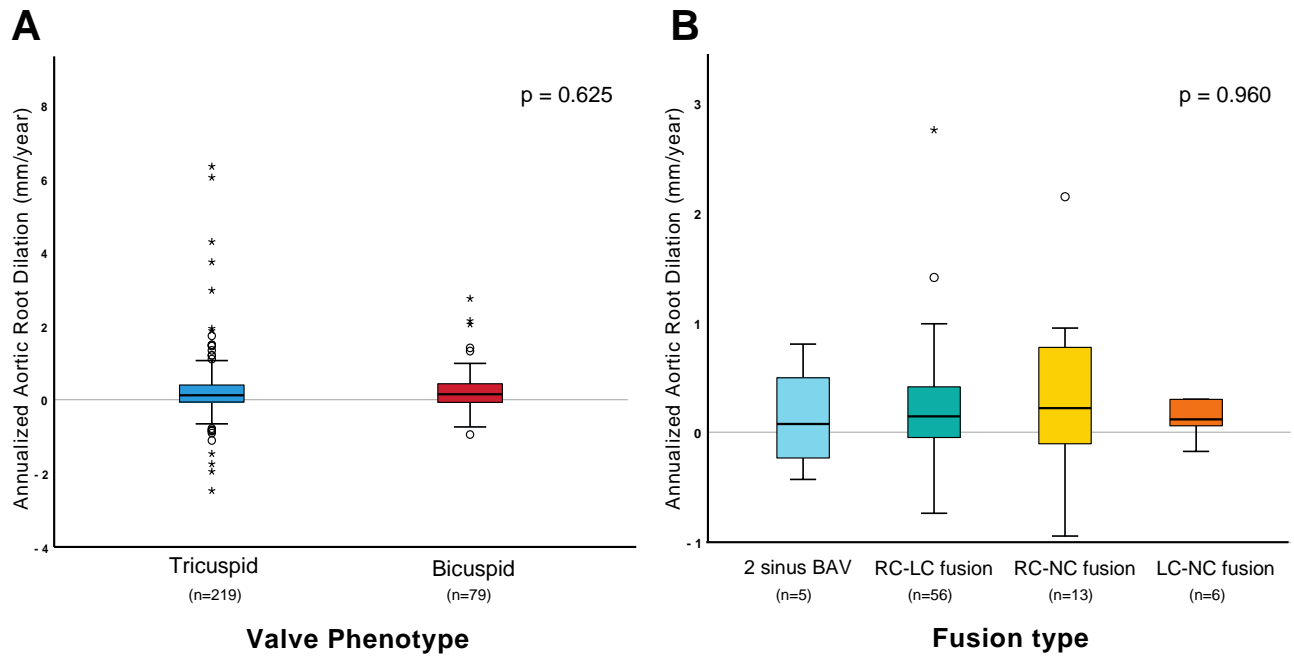

**Legend:** RC-LC; right-left coronary fusion, RC-NC; right-non coronary, LC-NC; left-non coronary fusion.

**Online Figure 3: Annualized Ascending Aorta and Aortic Root Dilation Rate According to Sex and Valve Phenotype**

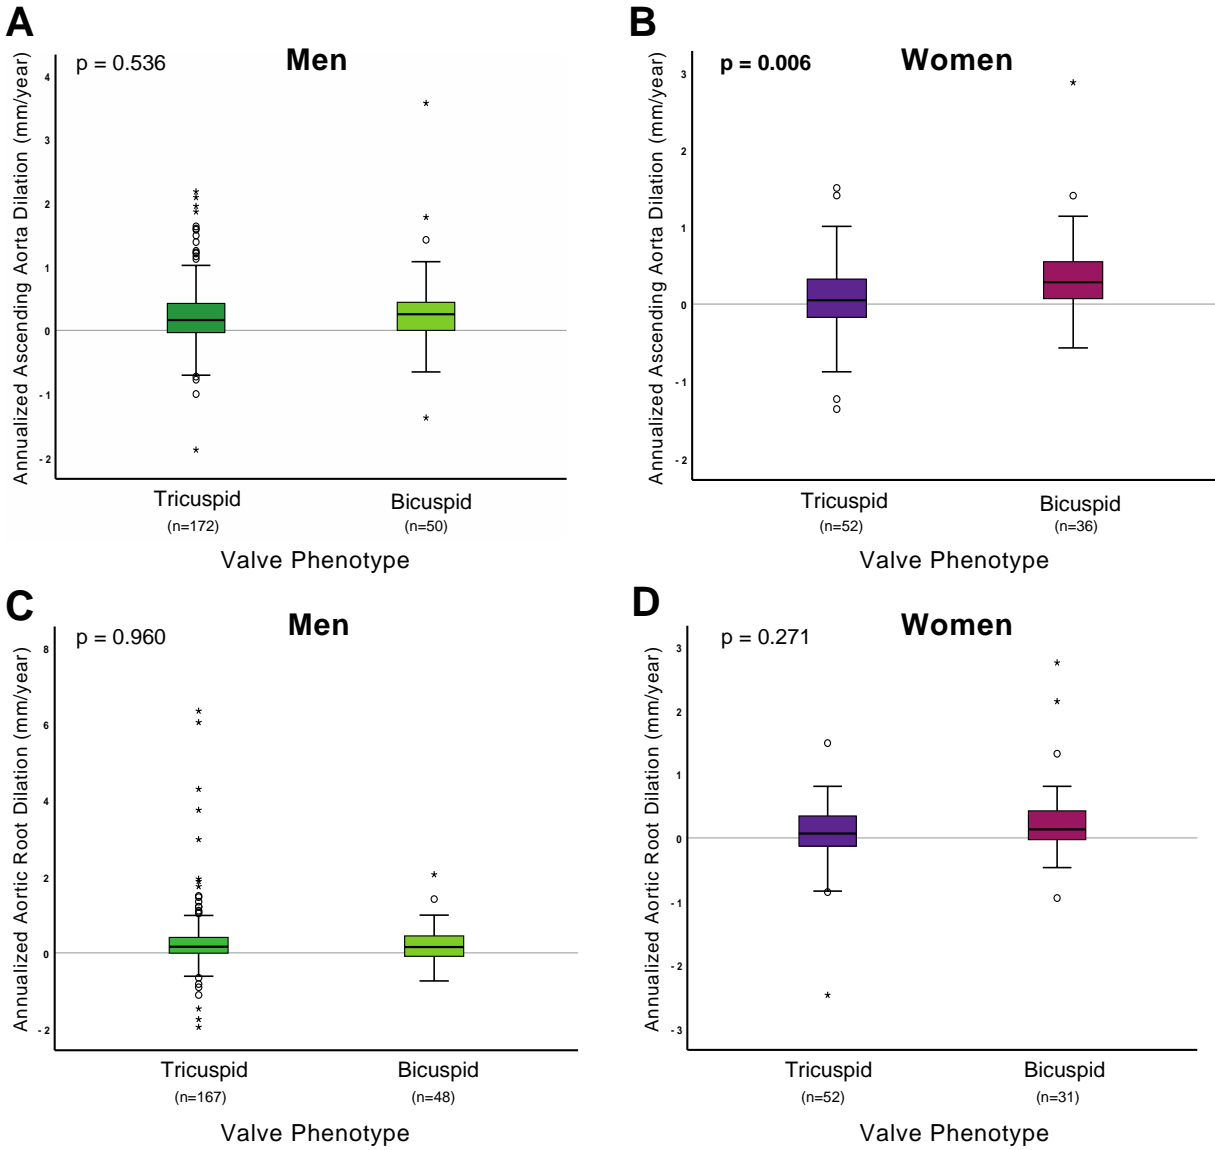

Supplement: openhrt-11-2-s001.pdf [file openhrt-11-2-s001.pdf]
